# Supplementary material
Source: Springer Nature journal article supplement (https://www.springermedizin.de/resource/supplementary/12961_2008_88_MOESM5_ESM.pdf/9571388)

**Figure 1. Family, Children and Youth Priority Themes**

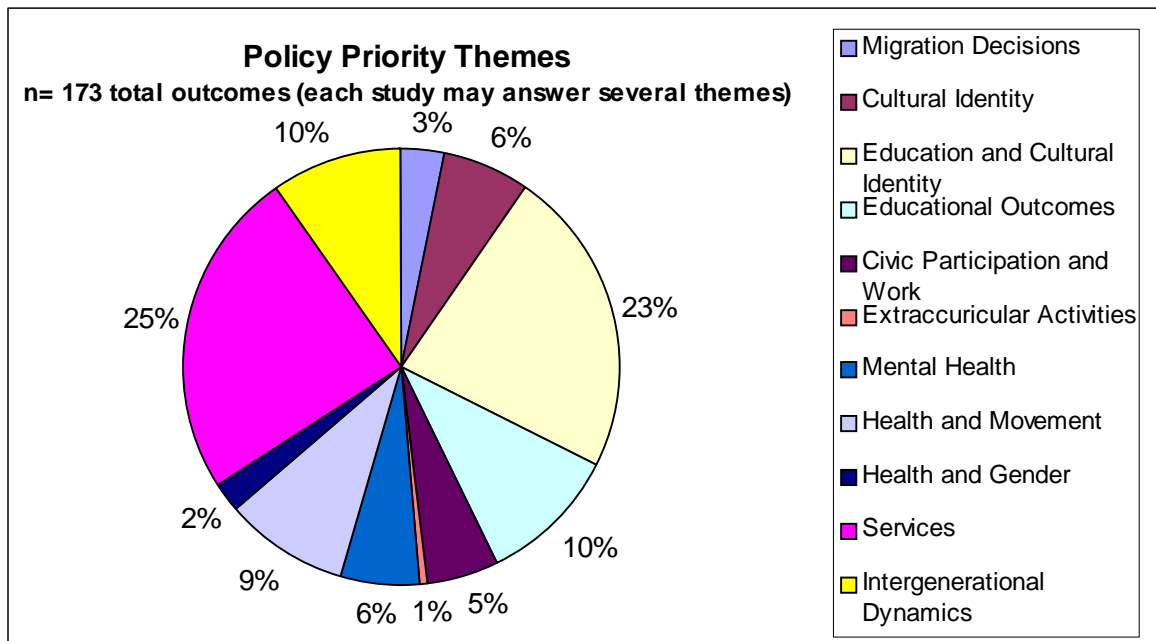

Supplement: MOESM5 [file 9571388]
